# Parental Smoking and Risk of Childhood Brain Tumors by Functional Polymorphisms in Polycyclic Aromatic Hydrocarbon Metabolism Genes

Jessica L. Barrington-Trimis<sup>1</sup>, Susan Searles Nielsen<sup>2</sup>, Susan Preston-Martin<sup>1</sup>, W. James Gauderman<sup>1</sup>, Elizabeth A. Holly<sup>3</sup>, Federico M. Farin<sup>4</sup>, Beth A. Mueller<sup>2,5</sup>, Roberta McKean-Cowdin<sup>1\*</sup>

**1** Department of Preventive Medicine, University of Southern California, Keck School of Medicine, Los Angeles, California, United States of America, **2** Public Health Sciences Division, Fred Hutchinson Cancer Research Center, Seattle, Washington, United States of America, **3** Department of Epidemiology and Biostatistics, School of Medicine, University of California San Francisco, San Francisco, California, United States of America, **4** Functional Genomics Core Laboratory, Center for Ecogenetics and Environmental Health, University of Washington, Seattle, Washington, United States of America, **5** Department of Epidemiology, School of Public Health and Community Medicine, University of Washington, Seattle, Washington, United States of America

## Abstract

**Background:** A recent meta-analysis suggested an association between exposure to paternal smoking during pregnancy and childhood brain tumor risk, but no studies have evaluated whether this association differs by polymorphisms in genes that metabolize tobacco-smoke chemicals.

**Methods:** We assessed 9 functional polymorphisms in 6 genes that affect the metabolism of polycyclic aromatic hydrocarbons (PAH) to evaluate potential interactions with parental smoking during pregnancy in a population-based case-control study of childhood brain tumors. Cases (N = 202) were ≤10 years old, diagnosed from 1984–1991 and identified in three Surveillance, Epidemiology, and End Results (SEER) registries in the western U.S. Controls (N = 286) were frequency matched by age, sex, and study center. DNA for genotyping was obtained from archived newborn dried blood spots.

**Results:** We found positive interaction odds ratios (ORs) for both maternal and paternal smoking during pregnancy, *EPHX1* H139R, and childhood brain tumors ( $P_{\text{interaction}} = 0.02; 0.10$ ), such that children with the high-risk (greater PAH activation) genotype were at a higher risk of brain tumors relative to children with the low-risk genotype when exposed to tobacco smoke during pregnancy. A dose-response pattern for paternal smoking was observed among children with the *EPHX1* H139R high-risk genotype only (OR<sub>no exposure</sub> = 1.0; OR<sub>≤3 hours/day</sub> = 1.32, 95% CI: 0.52–3.34; OR<sub>>3hours/day</sub> = 3.18, 95% CI: 0.92–11.0;  $P_{\text{trend}} = 0.07$ ).

**Conclusion:** Parental smoking during pregnancy may be a risk factor for childhood brain tumors among genetically susceptible children who more rapidly activate PAH in tobacco smoke.

**Citation:** Barrington-Trimis JL, Searles Nielsen S, Preston-Martin S, Gauderman WJ, Holly EA, et al. (2013) Parental Smoking and Risk of Childhood Brain Tumors by Functional Polymorphisms in Polycyclic Aromatic Hydrocarbon Metabolism Genes. PLoS ONE 8(11): e79110. doi:10.1371/journal.pone.0079110

**Editor:** Ludmila Prokunina-Olsson, National Cancer Institute, National Institutes of Health, United States of America

**Received:** July 8, 2013; **Accepted:** September 26, 2013; **Published:** November 18, 2013

**Copyright:** © 2013 Barrington-Trimis et al. This is an open-access article distributed under the terms of the Creative Commons Attribution License, which permits unrestricted use, distribution, and reproduction in any medium, provided the original author and source are credited.

**Funding:** This research was supported by grants R01CA116724, R03CA106011, NIEHS P30ES007033, NIEHS 5P30ES07048, NIEHS T32ES07262, NIEHS 2T32ES013678-06, National Institutes of Health; contract N01-CN-05230 from the National Cancer Institute; and Fred Hutchinson Cancer Research Center. The funders had no role in study design, data collection and analysis, decision to publish, or preparation of the manuscript.

**Competing Interests:** The authors have declared that no competing interests exist.

\* E-mail: mckeanco@usc.edu

## Introduction

The association between parental smoking during pregnancy and risk of childhood brain tumors is inconsistent in the literature. Most studies have reported positive associations between paternal smoking during pregnancy and childhood brain tumor risk, although the findings from only three studies were statistically significant [1–3]. Seven studies reported positive, but non-statistically significant associations [4–10], and two reported no association [11,12]. A meta-analysis, combining ten studies published prior to 2000, estimated a 22% increase in risk of childhood brain tumors with exposure to paternal tobacco smoke during pregnancy (95% CI: 1.05, 1.40) [13].

Studies examining the association between maternal smoking during pregnancy and childhood brain tumors generally suggest little to no increased risk. Ten studies reported no association [1,2,5,8,10,11,14–17], and six studies reported a positive, but statistically non-significant association [4,6,9,18–20]. Two meta-analyses estimated a statistically non-significant 4–5% increase in childhood brain tumor risk with maternal smoking during pregnancy using 12 of the above studies [13,21]. However, a more recent prospective study reported a statistically significant 24% increase in childhood brain tumor risk with maternal smoking during pregnancy [22]. Although many studies have evaluated parental smoking and childhood brain tumors, none have evaluated potential interactions with functional polymor-

phisms in genes whose enzyme products metabolize tobacco smoke carcinogens, such as polycyclic aromatic hydrocarbons (PAH). Animal studies suggest this class of chemicals may possibly affect brain tumor risk [23,24].

Several genes are associated with the activation (transformation to more carcinogenic intermediates) or detoxification of PAH. We focused on 6 genes of potential importance to our analysis of parental smoking (PAH exposure) and childhood brain tumors (Table 1). Microsomal epoxide hydrolase (mEH), coded by *EPHX1*, detoxifies selected substances (by catalyzing the hydrolysis of epoxide intermediates for excretion), and activates others, including PAH [25,26]. Single nucleotide polymorphisms (SNPs) in exon 3 (Y113H) and exon 4 (H139R) of *EPHX1* alter enzyme activity through amino acid changes [25,27]. A variant leading to a histidine (H) replacement of tyrosine (Y) at *EPHX1* Y113H results in decreased mEH activity, whereas a variant leading to an arginine (R) substitution of a histidine (H) at H139R results in increased mEH activity [27].

Myeloperoxidase (*MPO*) and sulfotransferase (*SULT1A1*) also activate carcinogens found in tobacco smoke, including PAHs. Variations in genotype at *MPO* G-463A [28], or *SULT1A1* R213H [29] result in greater enzyme activity leading to faster PAH activation. NAD(P)H: quinone oxidoreductase (*NQO1*), and glutathione S-transferases (including *GSTM1* and *GSTP1*) detoxify PAHs. Variant alleles at *NQO1* (P187S) [30,31], *GSTP1* I105V and *GSTP1* A114V [32–34], or a null genotype at *GSTM1* [34] result in decreased enzyme activity (detoxification) of at least some PAHs.

We analyzed the interaction between childhood brain tumors, exposure to parental smoking during pregnancy, and the child's genotype for the above 9 functional polymorphisms to evaluate whether the association between childhood brain tumors and parental smoking during pregnancy varies by genetic polymorphisms in the child.

## Materials and Methods

### Participants

Participants were cases and controls enrolled in the West Coast Childhood Brain Tumor study [35] for whom a dried blood spot

was located in newborn screening archives in California or Washington state (202 cases/286 controls) [36]. Cases were identified through the Surveillance, Epidemiology and End Results (SEER) registries in the Los Angeles, San Francisco-Oakland, and Seattle regions, and include children diagnosed with a tumor of the brain, cranial nerves, or meninges [*International Classification of Diseases-Oncology* (ICD-O) (World Health Organization 1976) codes 191.0–192.1] between 1984–1991. Controls living in the same regions were identified using random digit dialing, and were frequency matched to cases by age, sex, and study center. This analysis includes children born in Washington State in 1978 or later, or in California in 1982 or later, the birth years for which a specimen could still remain in the state archives. Children meeting these criteria were ≤10 years old. Specimens were obtained for 93% of eligible cases and 83% of eligible controls, as detailed elsewhere [36]. Cases and controls in this sample were similar to those in the larger study with respect to race/ethnicity and maternal education, but were born more recently and were therefore younger at diagnosis/reference date. Fewer astroglial cases and more medulloblastoma/primitive neuroectodermal tumor (PNET) cases were included in the present sample, consistent with a younger age at diagnosis [36]. Fewer case and control mothers and fathers smoked during pregnancy in more recent years than during earlier years.

### Exposure to Parental Smoking

Parental smoking was assessed by in-person interview with the subjects' mothers. Mothers were asked if they ever smoked tobacco during their pregnancy with the enrolled child (yes/no), and the number of cigarettes smoked per day or week. They also were asked whether there was regular tobacco smoke exposure during pregnancy (yes/no, and hours per day) from the child's father in the home, from any other household resident, or at work. Maternal exposure to tobacco smoke from the child's father during pregnancy will be hereafter referred to as "paternal smoking." Mothers and fathers also were asked if they ever smoked at least once a day for 3 months or longer prior to the pregnancy with the participating child (yes/no).

**Table 1.** Characteristics of Candidate Polymorphisms in Polycyclic Aromatic Hydrocarbon (PAH) Metabolism Genes.

| Enzyme                             | Expression                 | Gene           | Polymor. ID | Polymor. | Chr. | Enzyme Effect                            | Effect of High-Risk Allele                              | Ref.    |
|------------------------------------|----------------------------|----------------|-------------|----------|------|------------------------------------------|---------------------------------------------------------|---------|
| Microsomal Epoxide Hydrolase (mEH) | Fetus: Yes Brain: Yes [38] | <i>EPHX1</i>   | rs2234922   | H139R    | 1    | Activates PAHs                           | R: Faster PAH activation                                | [25–27] |
|                                    |                            | <i>EPHX1</i>   | rs1051740   | Y113H    | 1    | Activates PAHs                           | Y: Faster PAH activation                                |         |
|                                    |                            | <i>EPHX1</i>   | rs2854448   | C-613T   | 1    | Activates PAHs                           | T: More mEH (faster PAH activation)                     |         |
| Myeloperoxidase                    | Brain: Yes [46]            | <i>MPO</i>     | rs2333227   | G-463A   | 17   | Activates PAHs                           | G: Greater activity (faster PAH activation)             | [28]    |
| Sulfotransferase 1A1               | Fetus: Yes Brain: Yes [47] | <i>SULT1A1</i> | rs9282861   | R213H    | 16   | Activates PAHs                           | R: Greater activity (faster PAH activation)             | [29]    |
| NAD(P)H: Quinone Oxidoreductase    | Brain: Yes [48]            | <i>NQO1</i>    | rs1800566   | P187S    | 16   | Catalyzes detoxification of PAH quinines | S: Reduced enzyme activity (reduced PAH detoxification) | [30,31] |
| Glutathione S-Transferase Pi 1     | Fetus: Yes Brain: Yes [49] | <i>GSTP1</i>   | rs1695      | I105V    | 11   | Detoxifies PAH intermediates             | V: Reduced PAH detoxification                           | [32–34] |
|                                    |                            | <i>GSTP1</i>   | rs1138272   | A114V    | 11   | Detoxifies PAH intermediates             | V: Reduced PAH detoxification                           |         |
| Glutathione S-Transferase Mu 1     | Brain: Yes [49]            | <i>GSTM1</i>   |             | Null     | 1    | PAH detoxification                       | Null: No enzyme activity (reduced PAH detoxification)   | [32–34] |

doi:10.1371/journal.pone.0079110.t001

**Table 2.** Demographic Characteristics of Children With and Without Brain Tumors, West Coast Childhood Brain Tumor Study, Born 1978–1990.

|                                             | Cases<br>n(%) | Controls<br>n(%) |
|---------------------------------------------|---------------|------------------|
|                                             | N = 202       | N = 285          |
| <b>Race/Ethnicity</b>                       |               |                  |
| White                                       | 105 (53.6)    | 192 (67.8)       |
| Hispanic                                    | 62 (31.6)     | 61 (21.6)        |
| African American                            | 14 (7.1)      | 13 (4.6)         |
| Asian/other                                 | 15 (7.7)      | 17 (6.0)         |
| Unknown                                     | 6             | 2                |
| Male                                        | 121 (59.9)    | 168 (58.9)       |
| <b>Birth year</b>                           |               |                  |
| 1978–1980                                   | 10 (5.0)      | 27 (9.5)         |
| 1981–1983                                   | 52 (25.7)     | 80 (28.1)        |
| 1984–1986                                   | 93 (46.0)     | 107 (37.5)       |
| 1987–1990                                   | 47 (23.3)     | 71 (24.9)        |
| <b>Age at diagnosis (years)<sup>a</sup></b> |               |                  |
| <5                                          | 168 (83.2)    | 222 (77.9)       |
| 5–10                                        | 34 (16.8)     | 63 (22.1)        |
| <b>Mother's Education</b>                   |               |                  |
| No college <sup>b</sup>                     | 103 (51.0)    | 112 (39.3)       |
| Some college (no degree)                    | 57 (28.2)     | 88 (31.9)        |
| College or graduate degree                  | 42 (20.8)     | 85 (29.8)        |
| <b>Histologic tumor type</b>                |               |                  |
| Astroglial                                  | 97 (48.0)     |                  |
| PNET <sup>c</sup>                           | 55 (27.2)     |                  |
| Other                                       | 50 (24.8)     |                  |

<sup>a</sup>Reference age for controls.

<sup>b</sup><High school degree, high school degree, or basic or technical training only.

<sup>c</sup>Primitive neuroectodermal tumor.

doi:10.1371/journal.pone.0079110.t002

Maternal smoking during pregnancy was categorized by the typical number of cigarettes smoked per day: never smoked, 1–10, or 11+ cigarettes. Paternal smoking during pregnancy was categorized by the median number of hours per day the mother was exposed to tobacco smoke from the father (none, ≤3 hours per day, >3 hours per day).

**Genotyping**

Subjects' DNA was extracted from dried blood spot specimens from neonatal screening archives in California and Washington using the QIAamp DNA Mini Kit (QIAGEN, Valencia, CA) at the Center for Ecogenetics and Environmental Health Functional Genomics Laboratory at the University of Washington (Seattle, WA). Custom TaqMan Detection System-based assays-by-Design Service (Applied Biosystems, Inc., Foster City, CA) were used to assess *EPHX1* H139R (rs2234922), *EPHX1* Y113H (rs1051740), and *EPHX1* C-613T (rs2854448), *SULT1A1* R213H (rs9282861), *NQO1* P187S (rs1800566), *GSTP1* I105V (rs1695), *GSTP1* A114V (rs1138272), and rs2243828 (in complete linkage disequilibrium with *MPO* G-463A (rs2333227)). Microsomal epoxide hydrolase (mEH) activity was computed using *EPHX1* H139R and Y113H polymorphisms: low activity–0,1, or 2 stable alleles at H139R/

Y113H (HH/HH, HH/HR, HY/HH, HH/RR, HY/HR, YY/HH), or high activity–3 or 4 stable alleles (HY/RR, YY/HR, YY/RR). One multiplex PCR-based assay [37] assessed *GSTM1* null status. Complete genotyping data for all 9 polymorphisms was available for 200 (99.0%) cases and 284 (99.6%) controls. For 6% of cases and controls, duplicate and quadruplicate specimens were analyzed, blinded to initial results; analyses demonstrated complete concordance. Hardy Weinberg equilibrium was met ( $P>0.01$ ) for all genotype frequencies for controls when stratified by race/ethnicity, with the exception of *EPHX1* Y113H for Los Angeles non-Hispanic Whites ( $P<0.0001$ ), and for *NQO1* P187S for the heterogeneous 'Other' ethnicity ( $P=0.0003$ ).

**Statistical Analysis**

We used unconditional logistic regression to evaluate the primary associations and potential interaction of genotype at each locus with maternal and/or paternal smoking during pregnancy. Odds ratios (ORs) and 95% confidence intervals (CIs) were computed to estimate relative risks. For main associations and interaction analyses, genotypes were dichotomized and classified as low- or high-risk based on the ability of each variant to increase or decrease the activation or detoxification of PAHs (Table 1). All models were adjusted for frequency matching factors (age at diagnosis/reference age (<5, 5–10 years), sex, region (Los Angeles, San Francisco, Seattle), race/ethnicity (African-American, Non-Hispanic White, Hispanic, Asian/Other), and birth year (1978–84, 1985–90)). Models were also adjusted for mother's education (no college, some college, college or graduate degree) *a priori* with the expectation that maternal education is associated both with maternal or paternal smoking and childhood brain tumors. A parallel set of models were additionally adjusted for spousal smoking. Formal tests of interaction were conducted using a product term in each model. Case-only analyses were conducted after confirming independence of each gene-smoking association among controls. Consistencies of all associations were further evaluated by race/ethnicity (non-Hispanic White or Hispanic). Polytomous logistic regression was used to evaluate whether gene-environment interactions differed by histological tumor type (astroglial, medulloblastoma/PNET, or ependymoma/other); formal tests of heterogeneity were conducted. Tests for trend in dose analyses were evaluated using a 1df test for the categorized dose variable. Due to *a priori* hypotheses regarding the suspected functionality of the tested polymorphisms in the metabolism of tobacco smoke, no corrections for multiple comparisons were made. All reported *P*-values are two-sided.

**Ethics Statement**

Institutional Review Board approvals were obtained in California from the University of Southern California Institutional Review Board and the Committee for the Protection of Human Subjects at the Health and Human Services Agency of the State of California, and in Washington from the Fred Hutchinson Cancer Research Center and the Washington State Department of Health. Written informed consent for all participants was obtained prior to interview. Before release from neonatal archives in both California and Washington, all dried blood-spot specimens were anonymized by the assignment of a random specimen identification number that could not be linked to identifying information.

**Results**

Cases and controls were similar with regard to frequency-matched variables (Table 2). A higher proportion of controls were white (67.8% v. 53.6%,  $P=0.02$ ), and control mothers were more

**Table 3.** Risk of Childhood Brain Tumors in Relation to Exposure to Parental Smoking during pregnancy, West Coast Childhood Brain Tumor Study, Born 1978–1990.

| Exposure                                                     | Cases<br>N=202 n (%) | Controls<br>N=285 n (%) | Adj <sup>a</sup> OR | 95% CI     |
|--------------------------------------------------------------|----------------------|-------------------------|---------------------|------------|
| Maternal smoking (N = 125 cases; 200 controls <sup>b</sup> ) |                      |                         |                     |            |
| No exposure to tobacco smoke during pregnancy                | 104 (83.2)           | 153 (76.5)              | 1.00                |            |
| Mother smoked during pregnancy                               | 21 (16.8)            | 47 (23.5)               | 0.55                | 0.29, 1.05 |
| Mother only                                                  | 4 (3.2)              | 12 (6.0)                | 0.41                | 0.12, 1.42 |
| Mother and other passive/father <sup>c</sup>                 | 17 (13.6)            | 35 (17.5)               | 0.60                | 0.30, 1.21 |
| 1–10 cigarettes/day                                          | 5 (4.0)              | 26 (13.0)               | 0.23                | 0.08, 0.65 |
| 11+ cigarettes/day                                           | 16 (12.8)            | 21 (10.5)               | 1.00                | 0.46, 2.17 |
| <i>P for trend</i>                                           |                      |                         |                     | 0.42       |
| Paternal smoking (N = 149 cases; 210 controls <sup>d</sup> ) |                      |                         |                     |            |
| No exposure to tobacco smoke during pregnancy                | 104 (69.8)           | 153 (72.9)              | 1.00                |            |
| Father smoked during pregnancy                               | 45 (30.2)            | 57 (27.1)               | 1.03                | 0.62, 1.71 |
| Father only                                                  | 25 (16.8)            | 27 (12.9)               | 1.24                | 0.66, 2.35 |
| Father and other passive/mother <sup>c</sup>                 | 20 (13.4)            | 30 (14.3)               | 0.82                | 0.41, 1.63 |
| ≤3 hours/day <sup>e</sup>                                    | 24 (16.1)            | 33 (15.7)               | 0.86                | 0.46, 1.61 |
| >3 hours/day                                                 | 21 (14.1)            | 24 (11.4)               | 1.30                | 0.65, 2.59 |
| <i>P for trend</i>                                           |                      |                         |                     | 0.64       |

<sup>a</sup>Odds ratio and 95% CI, adjusted for race, sex, age at diagnosis/reference, mother's education, birth year and center.

<sup>b</sup>Excludes children exposed to only paternal or other passive smoking.

<sup>c</sup>Other passive is exposure to tobacco smoke from a household resident other than the father, or at the workplace.

<sup>d</sup>Excludes children exposed to only maternal or other passive smoking.

<sup>e</sup>Hours per day of exposure from the father only, or from the father and another source.

doi:10.1371/journal.pone.0079110.t003

likely to have a college or graduate degree (29.8% vs. 20.8%,  $P = 0.02$ ).

The ORs for childhood brain tumors in relation to maternal smoking during pregnancy were less than one, but not statistically significant (Table 3). One exception was maternal smoking at the lowest smoking level (OR = 0.23; 95% CI: 0.08, 0.65) relative to never smoking.

We observed a statistically non-significant increased OR associated with paternal smoking during pregnancy (OR = 1.24; 95% CI: 0.66, 2.35). Exposure to paternal smoking for >3 hours per day, vs. no exposure, was positively associated with childhood brain tumors (OR = 1.30; 95% CI: 0.65, 2.59). The OR for smoking by both parents during pregnancy was consistent with no association (data not shown). Results were similar when examined by histology (data not shown). No association was observed for maternal exposure to tobacco smoke from other household residents. However, the number of mothers reporting exposure from other household members during pregnancy was small (10.4% of cases, 7.4% of controls; data not shown).

We modeled the direct genotype-childhood brain tumor association using 'low-risk' or 'high-risk' genotypes (see Table S1 in File S1). No polymorphisms were associated with childhood brain tumors.

When we examined the association between maternal and paternal smoking (never/ever during pregnancy) and childhood brain tumor risk, by 'low-risk' or 'high-risk' genotype, we found a positive interaction OR for paternal smoking and *EPHX1* H139R (OR<sub>interaction</sub> = 2.21;  $P_{interaction} = 0.10$ , Table 4). In children with a high-risk genotype (HR/RR) for *EPHX1* H139R, exposure to paternal tobacco smoke during pregnancy was associated with increased risk of childhood brain tumors (OR = 1.78; 95% CI: 0.81, 3.91), whereas there was little observed association in

children with a low-risk genotype (HH) (OR = 0.83; 95% CI: 0.45, 1.54). The case-only analysis showed a similar association (OR = 1.99; 95% CI: 0.96, 4.20; see Table S2 in File S1). Effect estimates changed minimally after adjustment for maternal smoking, with the exception of *SULT1A1* R213H: we found a statistically significantly increased OR for children with the high-risk genotype after adjustment (OR<sub>high-risk</sub> = 2.19; 95% CI: 1.03, 4.65). Results were comparable when log-additive models were evaluated (data not shown). Other potential interactions were either statistically non-significant (e.g. mEH activity, *SULT1A1*, *GSTM1*) or did not manifest in a biologically plausible manner (e.g. *GSTP1* A114V) (see Table 4). We observed similar results for paternal smoking prior to pregnancy (never/ever) for all polymorphisms, with a positive interaction OR of a similar magnitude for *EPHX1* H139R (OR<sub>interaction</sub> = 1.91;  $P_{interaction} = 0.13$ ; data not shown). Results were similar when examined by histology (data not shown).

As with paternal smoking, we observed an interaction between maternal smoking and *EPHX1* H139R (OR<sub>interaction</sub> = 4.18;  $P_{interaction} = 0.02$ ; Table 5). Although shifted downward relative to paternal smoking ORs, the OR for children with a high-risk variant was again greater than that for children with a low-risk variant (*EPHX1* H139R: OR<sub>high-risk</sub> = 1.09; 95% CI: 0.44, 2.71; OR<sub>low-risk</sub> = 0.28; 95% CI: 0.12, 0.68). A similar interaction was observed for mEH activity (OR<sub>high-risk</sub> = 0.87; 95% CI: 0.42, 1.79; OR<sub>low-risk</sub> = 0.25; 95% CI: 0.07, 0.85; OR<sub>interaction</sub> = 4.49;  $P_{interaction} = 0.03$ ). The findings were supported by case-only analyses (*EPHX1* H139R: OR = 3.07; 95% CI: 1.14, 8.28; mEH activity: OR = 3.29; 95% CI: 1.01, 10.8; see Table S2 in File S1). Results were similar after adjustment for paternal smoking. Results did not differ by state (CA or WA) or histology (data not shown). Smaller and statistically non-significant positive interaction ORs

**Table 4.** Risk of Childhood Brain Tumors in Relation to Paternal Smoking during pregnancy by PAH Metabolism Genotype, West Coast Childhood Brain Tumor Study, Born 1978–1990.

| Polymorphism                 |          | Low-risk genotype |                   |            |                   |            | High-risk genotype |                   |            |                   |            | Interaction OR <sup>a</sup> |      | P-value for interaction <sup>a</sup> |      |
|------------------------------|----------|-------------------|-------------------|------------|-------------------|------------|--------------------|-------------------|------------|-------------------|------------|-----------------------------|------|--------------------------------------|------|
|                              |          | No/Yes            | Adj. <sup>b</sup> |            | Adj. <sup>c</sup> | 95% CI     | No/Yes             | Adj. <sup>b</sup> |            | Adj. <sup>c</sup> | 95% CI     | b                           | c    | b                                    | c    |
|                              |          |                   | OR                | 95% CI     |                   |            |                    | OR                | 95% CI     |                   |            |                             |      |                                      |      |
| EPHX1<br>H139R               | Cases    | 107/24            |                   |            |                   |            | 44/21              |                   |            |                   |            |                             |      |                                      |      |
|                              | Controls | 144/37            | 0.83              | 0.45, 1.54 | 1.10              | 0.57, 2.11 | 82/20              | 1.78              | 0.81, 3.91 | 1.84              | 0.81, 4.21 | 2.21                        | 2.26 | 0.10                                 | 0.10 |
| Y113H                        | Cases    | 67/21             |                   |            |                   |            | 84/24              |                   |            |                   |            |                             |      |                                      |      |
|                              | Controls | 113/27            | 0.99              | 0.52, 1.89 | 1.17              | 0.60, 2.33 | 113/30             | 1.42              | 0.69, 2.94 | 1.54              | 0.72, 3.32 | 1.19                        | 1.27 | 0.71                                 | 0.62 |
| C-613T                       | Cases    | 70/26             |                   |            |                   |            | 81/19              |                   |            |                   |            |                             |      |                                      |      |
|                              | Controls | 126/35            | 1.20              | 0.64, 2.26 | 1.47              | 0.75, 2.90 | 100/22             | 1.02              | 0.49, 2.12 | 1.16              | 0.55, 2.49 | 0.83                        | 0.78 | 0.69                                 | 0.61 |
| mEH<br>Activity <sup>d</sup> | Cases    | 66/15             |                   |            |                   |            | 85/30              |                   |            |                   |            |                             |      |                                      |      |
|                              | Controls | 84/23             | 0.84              | 0.38, 1.84 | 1.01              | 0.45, 2.33 | 142/34             | 1.43              | 0.78, 2.64 | 1.56              | 0.82, 2.98 | 1.67                        | 1.82 | 0.29                                 | 0.23 |
| MPO<br>G-463A <sup>e</sup>   | Cases    | 104/32            |                   |            |                   |            | 47/13              |                   |            |                   |            |                             |      |                                      |      |
|                              | Controls | 150/35            | 1.29              | 0.71, 2.32 | 1.48              | 0.80, 2.77 | 76/21              | 0.81              | 0.35, 1.89 | 1.07              | 0.44, 2.64 | 0.67                        | 0.64 | 0.43                                 | 0.39 |
| SULT1A1<br>R213H             | Cases    | 74/19             |                   |            |                   |            | 77/26              |                   |            |                   |            |                             |      |                                      |      |
|                              | Controls | 121/30            | 0.76              | 0.38, 1.54 | 0.85              | 0.41, 1.75 | 105/27             | 1.52              | 0.77, 3.00 | 2.19              | 1.03, 4.65 | 1.61                        | 1.75 | 0.31                                 | 0.25 |
| NQO1<br>P187S                | Cases    | 82/29             |                   |            |                   |            | 69/16              |                   |            |                   |            |                             |      |                                      |      |
|                              | Controls | 135/41            | 0.93              | 0.51, 1.69 | 1.08              | 0.57, 2.03 | 91/16              | 1.22              | 0.54, 2.75 | 1.50              | 0.63, 3.58 | 1.28                        | 1.25 | 0.62                                 | 0.66 |
| GSTP1<br>I105V               | Cases    | 66/17             |                   |            |                   |            | 85/28              |                   |            |                   |            |                             |      |                                      |      |
|                              | Controls | 74/18             | 1.01              | 0.46, 2.24 | 1.26              | 0.54, 2.98 | 152/39             | 1.10              | 0.60, 2.01 | 1.26              | 0.67, 2.37 | 1.16                        | 1.10 | 0.77                                 | 0.85 |
| A114V <sup>e</sup>           | Cases    | 132/42            |                   |            |                   |            | 19/3               |                   |            |                   |            |                             |      |                                      |      |
|                              | Controls | 188/41            | 1.30              | 0.78, 2.18 | 1.66              | 0.95, 2.89 | 38/15              | 0.33              | 0.07, 1.57 | 0.32              | 0.06, 1.66 | 0.27                        | 0.25 | 0.08                                 | 0.07 |
| GSTM1 <sup>f</sup>           | Cases    | 82/20             |                   |            |                   |            | 68/25              |                   |            |                   |            |                             |      |                                      |      |
|                              | Controls | 109/30            | 0.74              | 0.37, 1.50 | 0.82              | 0.39, 1.72 | 117/27             | 1.46              | 0.75, 2.87 | 1.86              | 0.90, 3.83 | 1.88                        | 1.81 | 0.18                                 | 0.22 |

<sup>a</sup>Interaction between genotype and smoking, using dichotomous genotype and exposure levels never and ever.

<sup>b</sup>Adjusted for race, sex, age at diagnosis, mother's education, birth year and center.

<sup>c</sup>Additionally adjusted for maternal smoking.

<sup>d</sup>Microsomal epoxide hydrolase (mEH) activity: low–0,1 or 2 stable alleles (HH/HH, HH/HR, HY/HH, HH/RR, HY/HR, YY/HH); high–3 or 4 stable alleles (HY/RR, YY/HR, YY/RR).

<sup>e</sup>Missing gene information for 1 control.

<sup>f</sup>Missing gene information for 1 case.

doi:10.1371/journal.pone.0079110.t004

were observed for *EPHX1* H139R and mEH activity for maternal smoking prior to pregnancy (never/ever).

A positive association between hours per day of exposure to paternal smoking during pregnancy and childhood brain tumor risk was observed only among children with a high-risk genotype (HR or RR) for *EPHX1* H139R ( $P_{\text{interaction}} = 0.07$ ; Table 6). For children with the high-risk genotype, those exposed to paternal smoking for >3 hours per day were 3.18 times as likely as unexposed children to develop a childhood brain tumor (95% CI: 0.92, 11.0). In contrast, among children with a low-risk genotype (HH), there was no childhood brain tumor-paternal smoking association ( $OR_{>3 \text{ hrs/day}} = 0.96$ ; 95% CI: 0.42, 2.20). A similar association was seen for *SULT1A1* R213H, although the interaction did not reach statistical significance. Among children with a high-risk genotype (RR), children exposed to >3 hours per day of smoke from the father were 2.57 times as likely as unexposed children to develop a childhood brain tumor (95% CI: 0.94, 7.01). This association was greater after adjusting for

maternal smoking during pregnancy ( $OR_{>3 \text{ hrs/day}} = 4.91$ ; 95% CI: 1.55, 15.6;  $P_{\text{trend}} = 0.01$ ). No increased risk was observed among children with a low-risk genotype ( $OR_{>3 \text{ hrs/day}} = 0.75$ ; 95% CI: 0.28, 1.96). Adjustment for maternal smoking had minimal effects on remaining polymorphisms. A suggestion of increasing ORs among carriers of high-risk genotypes also was observed by duration of exposure for *EPHX1* Y113H and mEH activity (see Table 5), and for *NQO1* P187S ( $P_{\text{interaction}} = 0.54$ , data not shown).

Similar to the paternal smoking data, a statistically significant interaction was observed for level of maternal smoking during pregnancy and *EPHX1* H139R genotype ( $P_{\text{interaction}} = 0.003$ ; see Table S3 in File S1). An interaction also was observed for mEH activity ( $P_{\text{interaction}} = 0.03$ ). Among children with a high-risk variant (RR or HR) for *EPHX1* H139R, children whose mothers smoked 11 or more cigarettes per day were twice as likely to develop a childhood brain tumor as children of mothers who did not smoke ( $OR = 2.19$ ; 95% CI: 0.72, 6.63), however, the number of children

**Table 5.** Risk of Childhood Brain Tumors in Relation to Maternal Smoking during pregnancy by PAH Metabolism Genotype, West Coast Childhood Brain Tumor Study, Born 1978–1990.

| Polymorphism              |          | Low-risk genotype |                      |            |                      |            | High-risk genotype |                      |            |                      |            | Interaction OR <sup>a</sup> |              | P-value for interaction <sup>a</sup> |              |
|---------------------------|----------|-------------------|----------------------|------------|----------------------|------------|--------------------|----------------------|------------|----------------------|------------|-----------------------------|--------------|--------------------------------------|--------------|
|                           |          | No/Yes            | Adj. <sup>b</sup> OR | 95% CI     | Adj. <sup>c</sup> OR | 95% CI     | No/Yes             | Adj. <sup>b</sup> OR | 95% CI     | Adj. <sup>c</sup> OR | 95% CI     | <sup>b</sup>                | <sup>c</sup> | <sup>b</sup>                         | <sup>c</sup> |
| EPHX1 H139R               | Cases    | 123/8             |                      |            |                      |            | 52/13              |                      |            |                      |            |                             |              |                                      |              |
|                           | Controls | 149/32            | 0.28                 | 0.12, 0.68 | 0.27                 | 0.11, 0.68 | 87/15              | 1.09                 | 0.44, 2.71 | 0.88                 | 0.34, 2.29 | 4.18                        | 4.20         | 0.02                                 | 0.02         |
| Y113H                     | Cases    | 99/9              |                      |            |                      |            | 76/12              |                      |            |                      |            |                             |              |                                      |              |
|                           | Controls | 119/24            | 0.46                 | 0.19, 1.11 | 0.43                 | 0.17, 1.09 | 117/23             | 0.85                 | 0.36, 2.02 | 0.73                 | 0.30, 1.81 | 1.96                        | 1.98         | 0.26                                 | 0.25         |
| C-613T                    | Cases    | 84/12             |                      |            |                      |            | 91/9               |                      |            |                      |            |                             |              |                                      |              |
|                           | Controls | 134/27            | 0.58                 | 0.26, 1.28 | 0.49                 | 0.21, 1.15 | 102/20             | 0.50                 | 0.20, 1.30 | 0.48                 | 0.18, 1.27 | 0.73                        | 0.75         | 0.59                                 | 0.63         |
| mEH Activity <sup>d</sup> | Cases    | 77/4              |                      |            |                      |            | 98/17              |                      |            |                      |            |                             |              |                                      |              |
|                           | Controls | 87/20             | 0.25                 | 0.07, 0.85 | 0.25                 | 0.07, 0.86 | 149/27             | 0.87                 | 0.42, 1.79 | 0.74                 | 0.34, 1.58 | 4.49                        | 4.44         | 0.03                                 | 0.03         |
| MPO G-463A <sup>e</sup>   | Cases    | 120/16            |                      |            |                      |            | 55/5               |                      |            |                      |            |                             |              |                                      |              |
|                           | Controls | 156/29            | 0.66                 | 0.32, 1.36 | 0.57                 | 0.26, 1.22 | 80/17              | 0.25                 | 0.08, 0.85 | 0.25                 | 0.07, 0.87 | 0.59                        | 0.60         | 0.42                                 | 0.44         |
| SULT1A1 R213H             | Cases    | 82/11             |                      |            |                      |            | 93/10              |                      |            |                      |            |                             |              |                                      |              |
|                           | Controls | 131/20            | 0.56                 | 0.22, 1.38 | 0.59                 | 0.23, 1.50 | 105/27             | 0.41                 | 0.17, 0.96 | 0.29                 | 0.11, 0.74 | 0.48                        | 0.47         | 0.21                                 | 0.20         |
| NQO1 P187S                | Cases    | 96/15             |                      |            |                      |            | 79/6               |                      |            |                      |            |                             |              |                                      |              |
|                           | Controls | 144/32            | 0.56                 | 0.27, 1.18 | 0.54                 | 0.25, 1.19 | 92/15              | 0.47                 | 0.16, 1.38 | 0.41                 | 0.13, 1.25 | 0.74                        | 0.74         | 0.63                                 | 0.64         |
| GSTP1 I105V               | Cases    | 75/8              |                      |            |                      |            | 100/13             |                      |            |                      |            |                             |              |                                      |              |
|                           | Controls | 76/16             | 0.48                 | 0.17, 1.40 | 0.43                 | 0.14, 1.35 | 160/31             | 0.59                 | 0.28, 1.25 | 0.54                 | 0.25, 1.19 | 1.52                        | 1.53         | 0.49                                 | 0.48         |
| A114V <sup>e</sup>        | Cases    | 155/19            |                      |            |                      |            | 20/2               |                      |            |                      |            |                             |              |                                      |              |
|                           | Controls | 188/41            | 0.49                 | 0.26, 0.93 | 0.41                 | 0.21, 0.80 | 47/6               | 0.70                 | 0.09, 5.39 | 1.09                 | 0.12, 10.1 | 1.19                        | 1.14         | 0.85                                 | 0.89         |
| GSTM1 <sup>f</sup>        | Cases    | 90/12             |                      |            |                      |            | 84/9               |                      |            |                      |            |                             |              |                                      |              |
|                           | Controls | 117/22            | 0.63                 | 0.27, 1.45 | 0.68                 | 0.28, 1.62 | 119/25             | 0.39                 | 0.16, 0.98 | 0.32                 | 0.13, 0.83 | 0.70                        | 0.72         | 0.54                                 | 0.57         |

<sup>a</sup>Interaction between genotype and smoking, using dichotomous genotype and exposure levels never and ever.

<sup>b</sup>Adjusted for race, sex, age at diagnosis, mother's education, birth year and center.

<sup>c</sup>Additionally adjusted for paternal smoking.

<sup>d</sup>Microsomal epoxide hydrolase (mEH) activity: low–0,1 or 2 stable alleles (HH/HH, HH/HR, HY/HH, HH/RR, HY/HR, YY/HH); high–3 or 4 stable alleles (HY/RR, YY/HR, YY/RR).

<sup>e</sup>Missing gene information for 1 control.

<sup>f</sup>Missing gene information for 1 case.

doi:10.1371/journal.pone.0079110.t005

exposed to high levels of maternal smoking was low. Among children with a low-risk genotype, there was no increase in childhood brain tumor risk observed in relation to smoking. Results were similar for high mEH activity. Effect estimates decreased slightly after adjustment for paternal smoking.

Figure 1 shows trends in childhood brain tumor risk by *EPHX1* H139R genotype for children exposed to paternal or maternal tobacco smoke during pregnancy. The pattern of increased risk associated with exposure to tobacco smoke for children with a high-risk genotype, in contrast to those with a low-risk genotype, persists for children exposed to either maternal or paternal smoking, as evidenced by the parallel interactions presented. Similar patterns were observed for mEH activity.

## Discussion

Our study expands on previous studies by evaluating the modifying effect of selected genetic polymorphisms involved in the metabolism of carcinogens present in tobacco smoke. We identified biologically plausible interactions between *EPHX1* H139R and both maternal and paternal smoking overall (never/ever) and by level of exposure. Our results suggest that childhood brain tumor risk may be associated with exposure to parental

smoking during pregnancy for children with genetic susceptibility to carcinogenic PAHs present in tobacco smoke.

mEH is considered a detoxification enzyme for many substrates. However, in the process of PAH detoxification, carcinogenic highly-activated intermediates may be generated. mEH metabolizes PAHs to bay region diol-epoxides [26] that have potential to bind to DNA and cause mutations. A variant at exon 4 in *EPHX1* results in increased mEH activity [27], and presumably greater levels of activated PAHs. Further, *EPHX1* is expressed in the brain and during the fetal period [38].

The parental smoking-childhood brain tumor association was quite different for maternal vs. paternal smoking, overall and by strata of genotype for *EPHX1* H139R and mEH activity. In our primary associations analysis, exposure to maternal smoking during pregnancy resulted in an OR <1, whereas exposure to paternal smoking was positively associated with childhood brain tumors. However, interaction ORs for childhood brain tumors, *EPHX1* H139R and parental smoking were above null for both maternal smoking and paternal smoking (Figure 1). Similar results were observed for mEH activity.

Potential reasons for the observed protective association between maternal smoking (disregarding genotype) and childhood brain tumors are likely related to one of two different explanations.

**Table 6.** Risk of Childhood Brain Tumors in Relation to Paternal Smoking Level during pregnancy by Polymorphisms in Selected Genes, West Coast Childhood Brain Tumor Study, Born 1978–1990.

| Polymorphism              | Exposure <sup>a</sup> | Low-risk genotype |                      |            |                      | High-risk genotype |                |                      |            | P-value for interaction <sup>d</sup> |            |      |      |
|---------------------------|-----------------------|-------------------|----------------------|------------|----------------------|--------------------|----------------|----------------------|------------|--------------------------------------|------------|------|------|
|                           |                       | Cases/Controls    | Adj. <sup>b</sup> OR | 95% CI     | Adj. <sup>c</sup> OR | 95% CI             | Cases/Controls | Adj. <sup>b</sup> OR | 95% CI     | Adj. <sup>c</sup> OR                 | 95% CI     | b    | c    |
| EPHX1 H139R               | Never                 | 107/144           | 1.00                 |            | 1.00                 |                    | 44/82          | 1.00                 |            | 1.00                                 |            | 0.07 | 0.07 |
|                           | ≤3 hours              | 12/18             | 0.74                 | 0.33, 1.65 | 0.83                 | 0.36, 1.93         | 12/15          | 1.32                 | 0.52, 3.34 | 1.37                                 | 0.53, 3.57 |      |      |
|                           | >3 hours              | 12/19             | 0.96                 | 0.42, 2.20 | 1.54                 | 0.62, 3.83         | 9/5            | 3.18                 | 0.92, 11.0 | 3.32                                 | 0.93, 11.9 |      |      |
|                           | <i>P for trend</i>    |                   |                      | 0.71       |                      | 0.52               |                |                      | 0.07       |                                      | 0.07       |      |      |
| EPHX1 Y113H               | Never                 | 84/113            | 1.00                 |            | 1.00                 |                    | 67/113         | 1.00                 |            | 1.00                                 |            | 0.47 | 0.45 |
|                           | ≤3 hours              | 17/19             | 1.01                 | 0.48, 2.14 | 1.23                 | 0.80, 1.89         | 7/14           | 0.87                 | 0.31, 2.48 | 0.93                                 | 0.32, 2.70 |      |      |
|                           | >3 hours              | 7/11              | 0.93                 | 0.32, 2.73 | 1.4                  | 0.91, 2.15         | 14/13          | 2.03                 | 0.83, 4.99 | 2.31                                 | 0.89, 6.01 |      |      |
|                           | <i>P for trend</i>    |                   |                      | 0.93       |                      | 0.64               |                |                      | 0.18       |                                      | 0.12       |      |      |
| mEH Activity <sup>e</sup> | Never                 | 66/84             | 1.00                 |            | 1.00                 |                    | 85/142         | 1.00                 |            | 1.00                                 |            | 0.16 | 0.12 |
|                           | ≤3 hours              | 10/12             | 0.94                 | 0.36, 2.44 | 1.11                 | 0.42, 2.96         | 14/21          | 1.05                 | 0.48, 2.29 | 1.13                                 | 0.51, 2.50 |      |      |
|                           | >3 hours              | 5/11              | 0.69                 | 0.21, 2.31 | 0.88                 | 0.25, 3.15         | 16/13          | 2.08                 | 0.90, 4.79 | 2.41                                 | 0.98, 5.89 |      |      |
|                           | <i>P for trend</i>    |                   |                      | 0.58       |                      | 0.94               |                |                      | 0.12       |                                      | 0.08       |      |      |
| SULT1A1 R213H             | Never                 | 74/121            | 1.00                 |            | 1.00                 |                    | 77/105         | 1.00                 |            | 1.00                                 |            | 0.23 | 0.16 |
|                           | ≤3 hours              | 10/16             | 0.78                 | 0.32, 1.92 | 0.84                 | 0.34, 2.10         | 14/17          | 1.09                 | 0.48, 2.48 | 1.44                                 | 0.60, 3.43 |      |      |
|                           | >3 hours              | 9/14              | 0.75                 | 0.28, 1.96 | 0.86                 | 0.32, 2.30         | 12/10          | 2.57                 | 0.94, 7.01 | 4.91                                 | 1.55, 15.6 |      |      |
|                           | <i>P for trend</i>    |                   |                      | 0.47       |                      | 0.69               |                |                      | 0.10       |                                      | 0.01       |      |      |

<sup>a</sup>Hours of exposure per day.

<sup>b</sup>Adjusted for race, sex, age at diagnosis/reference, mother’s education, birth year and center.

<sup>c</sup>Additionally adjusted for maternal smoking.

<sup>d</sup>Interaction between genotype and smoking, using hours of exposure per day (interaction for trend).

<sup>e</sup>Microsomal epoxide hydrolase (mEH) activity: low–0,1 or 2 stable alleles (HH/HH, HH/HR, HY/HH, HH/RR, HY/HR, YY/HH); high–3 or 4 stable alleles (HY/RR, YY/HR, YY/RR).

doi:10.1371/journal.pone.0079110.t006

First, the data on maternal smoking during pregnancy may be subject to maternal reporting bias. If mothers of cases were more likely than mothers of controls to underreport smoking, an

artificially low association could result. Second, a similar bias could have occurred if among smokers we contacted, mothers of cases were less likely than mothers of controls to participate in the study.

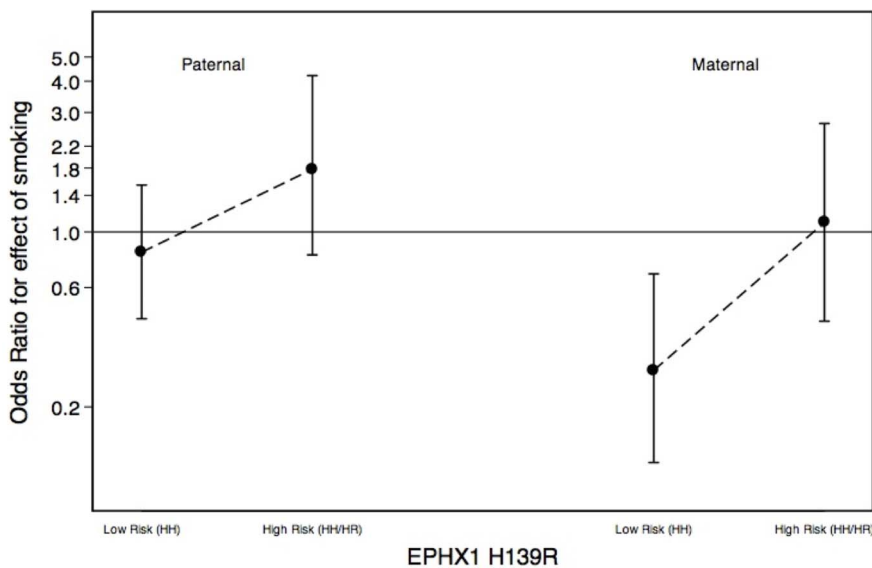

**Figure 1.** Risk of Childhood Brain Tumors by *EPHX1* H139R Genotype and Exposure to Parental Smoking (Maternal/Paternal), West Coast Childhood Brain Tumor Study, Born 1978–1990.

doi:10.1371/journal.pone.0079110.g001

The occurrence of ORs <1 for maternal smoking during pregnancy, especially more recently when smoking has become less socially acceptable, is consistent with either possible source of bias. Although these factors may have biased the maternal smoking-childhood brain tumor association downward, they are unlikely to account for the observed interactions. Gene-environment interactions are largely unaffected by selection bias [39] and biased conservatively by any reporting/recall that may differ by case status [40]. Confirmation of the interactions in the case-only analysis suggests the finding is not due to control selection or differential reporting.

The differences in maternal vs. paternal smoking ORs may be due to true biological differences in these associations with childhood brain tumor risk. However, if this were the case, we might have expected to observe dissimilar interaction ORs for maternal and paternal smoking with respect to *EPHX1* H139R genotype. Our data suggest that children with a high-risk genotype are at a greater risk of childhood brain tumors if exposed to either maternal or paternal smoking during pregnancy, relative to children with a low-risk genotype and similar exposures. This may indicate that PAH activation increases risk regardless of the source of parental exposure.

The carcinogenic process may be initiated through maternal exposure to environmental tobacco smoke from the father, or through the sperm, as a result of paternal smoking shortly before the child's conception. Although our primary results focused on paternal smoking during pregnancy, we observed similar interaction ORs for paternal smoking prior to pregnancy. Paternal smoking may induce genotoxic effects on sperm; studies of male smokers have demonstrated greater levels of oxo<sup>8</sup>dG (an oxidative product of DNA damage) [41], 8-hydroxydeoxyguanosine [42], and benzo(a)pyrene diol epoxide-DNA adducts [43,44] in sperm DNA, and an increased risk of aneuploidy [45]. However, the potential role of these in the etiology of brain tumors has not been established.

Both strengths and limitations of this analysis need to be considered in the interpretation of the data. Although this is a relatively large population-based study of childhood brain tumors with comprehensive ascertainment of cases and highly comparable population-based controls, our sample is small for gene-environment interaction analyses. Therefore, these findings could be explained by chance. We also focused on polymorphisms from a small number of candidate genes relevant to PAH specifically. We did not explore other genes associated with metabolism of other potential carcinogens in tobacco smoke and therefore may have missed some important interactions. We did not have DNA or

genotype data for mothers, which during the pregnancy could influence PAH metabolism in combination with the child's genotype. However, to our knowledge this is the first assessment of these interactions. Moreover, use of archival dried blood spots allowed inclusion of all cases regardless of survival status, therefore minimizing survival bias that may be problematic in case-control studies of highly fatal diseases.

Our study supports previous findings that parental smoking may be a risk factor for childhood brain tumors, and provides new information that risk may vary by genetic susceptibility. Studies that have reported no association may have been limited by inaccurate self-report of maternal smoking, and a lack of data on the genetic susceptibility of children in the study. Future studies of childhood brain tumors and parental smoking should include biological markers of smoking, in addition to data on the genetic susceptibility of children to tobacco smoke, to confirm and extend the results reported here.

## Supporting Information

**File S1 Table S1.** Risk of childhood brain tumors in relation to polycyclic aromatic hydrocarbon (PAH) metabolism polymorphisms, West Coast Childhood Brain Tumor Study, N=479. **Table S2.** Association between exposure to prenatal parental smoking and selected polymorphisms in a case-only analysis, West Coast Childhood Brain Tumor Study, N = 196. **Table S3.** Risk of childhood brain tumors in relation to maternal smoking level during pregnancy by polymorphisms in selected genes, West Coast Childhood Brain Tumor Study. (DOCX)

## Acknowledgments

We thank the Washington State Department of Health Newborn Screening Program, Michael Glass and Michael Ginder, California Department of Public Health Genetic Disease Screening Program, Steve Graham, Marty Kharrazi, and Fred Lorey, the Sequoia Foundation for obtaining specimens, and the Functional Genomics Core Laboratory, Center for Ecogenetics and Environmental Health, University of Washington, Jesse Tsai and Hannah-Malia A. Viernes for genotyping.

## Author Contributions

Conceived and designed the experiments: SSN SPM EAH BAM RMC. Performed the experiments: SSN SPM EAH BAM RMC FMF. Analyzed the data: SSN BAM RMC JLBT WJG. Wrote the paper: JLBT SSN BAM RMC.

## References

- Preston-Martin S, Yu MC, Benton B, Henderson BE (1982) N-Nitroso compounds and childhood brain tumors: a case-control study. *Cancer research* 42: 5240–5245.
- McCredie M, Maisonneuve P, Boyle P (1994) Antenatal risk factors for malignant brain tumours in New South Wales children. *Int J Cancer* 56: 6–10.
- Sorahan T, Lancashire RJ, Hultén MA, Peck I, Stewart AM (1997) Childhood cancer and parental use of tobacco: deaths from 1953 to 1955. *Br J Cancer* 75: 134–138.
- Howe GR, Burch JD, Chiarelli AM, Risch HA, Choi BC (1989) An exploratory case-control study of brain tumors in children. *Cancer research* 49: 4349–4352.
- Norman MA, Holly EA, Ahn DK, Preston-Martin S, Mueller BA, et al. (1996) Prenatal exposure to tobacco smoke and childhood brain tumors: results from the United States West Coast childhood brain tumor study. *Cancer epidemiology, biomarkers & prevention* : a publication of the American Association for Cancer Research, cosponsored by the American Society of Preventive Oncology 5: 127–133.
- Hu J, Mao Y (2000) Parental Cigarette Smoking, Hard Liquor Consumption and the Risk of Childhood Brain Tumors-A Case Study in Northeast China. *Acta Oncologica*.
- Cordier S, Monfort C, Filippini G, Preston-Martin S, Lubin J, et al. (2004) Parental exposure to polycyclic aromatic hydrocarbons and the risk of childhood brain tumors: The SEARCH International Childhood Brain Tumor Study. *American journal of epidemiology* 159: 1109–1116.
- John EM, Savitz DA, Sandler DP (1991) Prenatal exposure to parents' smoking and childhood cancer. *Am J Epidemiol* 133: 123–132.
- Filippini G, Farinotti M, Lovicu G, Maisonneuve P, Boyle P (1994) Mothers' active and passive smoking during pregnancy and risk of brain tumours in children. *Int J Cancer* 57: 769–774.
- Gold EB, Leviton A, Lopez R, Gilles FH, Hedley-Whyte ET, et al. (1993) Parental smoking and risk of childhood brain tumors. *Am J Epidemiol* 137: 620–628.
- Bunin GR, Buckley JD, Boesel CP, Rorke LB (1994) Risk factors for astrocytic glioma and primitive neuroectodermal tumor of the brain in young children: a report from the Children's Cancer Group. *Cancer Epidemiology* ....
- Filippini G, Maisonneuve P, McCredie M, Peris-Bonet R, Modan B, et al. (2002) Relation of childhood brain tumors to exposure of parents and children to tobacco smoke: The Search international case-control study. *International Journal of Cancer* 100: 206–213.



13. Boffetta P, Trédaniel J, Greco A (2000) Risk of childhood cancer and adult lung cancer after childhood exposure to passive smoke: A meta-analysis. *Environmental Health Perspectives* 108: 73–82.
14. Kuijten RR, Bunin GR, Nass CC, Meadows AT (1990) Gestational and familial risk factors for childhood astrocytoma: results of a case-control study. *Cancer research* 50: 2608–2612.
15. Stjernfeldt M, Lindsten J, Berglund K (1986) Maternal smoking during pregnancy and risk of childhood cancer. *The Lancet*.
16. Sorahan T, Prior P, Lancashire RJ, Faux SP, Hultén MA, et al. (1997) Childhood cancer and parental use of tobacco: deaths from 1971 to 1976. *British Journal of Cancer* 76: 1525–1531.
17. Pershagen G, Ericson A, Otterblad-Olausson P (1992) Maternal smoking in pregnancy: does it increase the risk of childhood cancer? *Int J Epidemiol* 21: 1–5.
18. Cordier S, Iglesias MJ, Le Goaster C (1994) Incidence and risk factors for childhood brain tumors in the Ile de France. ... *journal of cancer*.
19. Kramer S, Ward E, Meadows AT, Malone KE (1987) Medical and drug risk factors associated with neuroblastoma: a case-control study. *Journal of the National Cancer Institute* 78: 797–804.
20. Schwartzbaum JA (1992) Influence of the mother's prenatal drug consumption on risk of neuroblastoma in the child. *Am J Epidemiol* 135: 1358–1367.
21. Huncharek M, Kupelnick B, Klassen H (2002) Maternal smoking during pregnancy and the risk of childhood brain tumors: a meta-analysis of 6566 subjects from twelve epidemiological studies. *Journal of neuro-oncology* 57: 51–57.
22. Brooks DR, Mucci LA, Hatch EE, Cnattingius S (2004) Maternal smoking during pregnancy and risk of brain tumors in the offspring. A prospective study of 1.4 million Swedish births. *Cancer causes & control : CCC* 15: 997–1005.
23. Rice JMV, Ward JM (1982) Age dependence of susceptibility to carcinogenesis in the nervous system. *Ann N Y Acad Sci* 381: 274–289.
24. Markovits P, Maunoury R, Tripier MF, Coulomb B, Levy S, et al. (1979) Normal and benzo(a)pyrene-transformed fetal mouse brain cell. I. Tumorigenicity and immunochemical detection of glial fibrillary acidic protein. *Acta Neuropathol* 47: 197–203.
25. Lacko M, Oude Ophuis MB, Peters WH, Manni JJ (2009) Genetic polymorphisms of smoking-related carcinogen detoxifying enzymes and head and neck cancer susceptibility. *Anticancer Res* 29: 753–761.
26. Hulla JE, Miller MS, Taylor JA, Hein DW, Furlong CE, et al. (1999) Symposium overview: the role of genetic polymorphism and repair deficiencies in environmental disease. *Toxicol Sci* 47: 135–143.
27. Hassett C, Aicher L, Sidhu JS, Omiecinski CJ (1994) Human microsomal epoxide hydrolase: genetic polymorphism and functional expression in vitro of amino acid variants. *Hum Mol Genet* 3: 421–428.
28. Taioli E, Benhamou S, Bouchardy C, Cascorbi I, Cajas-Salazar N, et al. (2007) Myeloperoxidase G-463A polymorphism and lung cancer: a HuGE genetic susceptibility to environmental carcinogens pooled analysis. *Genet Med* 9: 67–73.
29. Kotnis A, Kannan S, Sarin R, Mulherkar R (2008) Case-control study and meta-analysis of SULT1A1 Arg213His polymorphism for gene, ethnicity and environment interaction for cancer risk. *Br J Cancer* 99: 1340–1347.
30. Nisa H, Kono S, Yin G, Toyomura K, Nagano J, et al. (2010) Cigarette smoking, genetic polymorphisms and colorectal cancer risk: the Fukuoka Colorectal Cancer Study. *BMC Cancer* 10: 274.
31. Kim HN, Kim NY, Yu L, Kim YK, Lee IK, et al. (2009) Polymorphisms of drug-metabolizing genes and risk of non-Hodgkin lymphoma. *Am J Hematol* 84: 821–825.
32. Lavender NA, Benford ML, VanCleave TT, Brock GN, Kittles RA, et al. (2009) Examination of polymorphic glutathione S-transferase (GST) genes, tobacco smoking and prostate cancer risk among men of African descent: a case-control study. *BMC Cancer* 9: 397.
33. Koh WP, Nelson HH, Yuan JM, Van den Berg D, Jin A, et al. (2011) Glutathione S-transferase (GST) gene polymorphisms, cigarette smoking and colorectal cancer risk among Chinese in Singapore. *Carcinogenesis* 32: 1507–1511.
34. Kukkonen MK, Hämäläinen S, Kaleva S, Vehmas T, Huuskonen MS, et al. (2011) Genetic polymorphisms of xenobiotic-metabolizing enzymes influence the risk of pulmonary emphysema. *Pharmacogenet Genomics* 21: 876–883.
35. Preston-Martin S, Gurney JG, Pogoda JM, Holly EA, Mueller BA (1996) Brain tumor risk in children in relation to use of electric blankets and water bed heaters. Results from the United States West Coast Childhood Brain Tumor Study. *Am J Epidemiol* 143: 1116–1122.
36. Searles Nielsen S, Mueller BA, Preston-Martin S, Farin FM, Holly EA, et al. (2011) Childhood brain tumors and maternal cured meat consumption in pregnancy: differential effect by glutathione S-transferases. *Cancer Epidemiol Biomarkers Prev* 20: 2413–2419.
37. Chen CL, Liu Q, Relling MV (1996) Simultaneous characterization of glutathione S-transferase M1 and T1 polymorphisms by polymerase chain reaction in American whites and blacks. *Pharmacogenetics* 6: 187–191.
38. Farin FM, Omiecinski CJ (1993) Regiospecific expression of cytochrome P-450s and microsomal epoxide hydrolase in human brain tissue. *J Toxicol Environ Health* 40: 317–335.
39. Morimoto LM, White E, Newcomb PA (2003) Selection bias in the assessment of gene-environment interaction in case-control studies. *Am J Epidemiol* 158: 259–263.
40. Garcia-Closas M, Rothman N, Lubin J (1999) Misclassification in case-control studies of gene-environment interactions: assessment of bias and sample size. *Cancer Epidemiol Biomarkers Prev* 8: 1043–1050.
41. Fraga CG, Motchnik PA, Wyrobek AJ, Rempel DM, Ames BN (1996) Smoking and low antioxidant levels increase oxidative damage to sperm DNA. *Mutat Res* 351: 199–203.
42. Shen HM, Chia SE, Ni ZY, New AL, Lee BL, et al. (1997) Detection of oxidative DNA damage in human sperm and the association with cigarette smoking. *Reprod Toxicol* 11: 675–680.
43. Zenes MT, Bielecki R, Reed TE (1999) Detection of benzo(a)pyrene diol epoxide-DNA adducts in sperm of men exposed to cigarette smoke. *Fertil Steril* 72: 330–335.
44. Zenes MT, Puy LA, Bielecki R, Reed TE (1999) Detection of benzo[a]pyrene diol epoxide-DNA adducts in embryos from smoking couples: evidence for transmission by spermatozoa. *Mol Hum Reprod* 5: 125–131.
45. Shi Q, Ko E, Barclay L, Hoang T, Rademaker A, et al. (2001) Cigarette smoking and aneuploidy in human sperm. *Mol Reprod Dev* 59: 417–421.
46. Green PS, Mendez AJ, Jacob JS, Crowley JR, Growdon W, et al. (2004) Neuronal expression of myeloperoxidase is increased in Alzheimer's disease. *J Neurochem* 90: 724–733.
47. Richard K, Hume R, Kaptein E, Stanley EL, Visser TJ, et al. (2001) Sulfation of thyroid hormone and dopamine during human development: ontogeny of phenol sulfotransferases and arylsulfatase in liver, lung, and brain. *J Clin Endocrinol Metab* 86: 2734–2742.
48. van Muiswinkel FL, de Vos RA, Bol JG, Andringa G, Jansen Steur EN, et al. (2004) Expression of NAD(P)H:quinone oxidoreductase in the normal and Parkinsonian substantia nigra. *Neurobiol Aging* 25: 1253–1262.
49. Hayes JD, Pulford DJ (1995) The glutathione S-transferase supergene family: regulation of GST and the contribution of the isoenzymes to cancer chemoprotection and drug resistance. *Crit Rev Biochem Mol Biol* 30: 445–600.
